# Supplementary material for: Effects of Magnetic Nanoparticles on the Functional Activity of Human Monocytes and Dendritic Cells
Source: MDPI journal article supplement (doi:10.3390/ijms24021358), 2023-01-10
Supplement: s1 [file s1]

# Effects of Magnetic Nanoparticles on the Functional Activity of Human Monocytes and Dendritic Cells

**Marta Donini <sup>1,†</sup>, Francesca Pettinella <sup>1,†</sup>, Giorgia Zanella <sup>2</sup>, Salvatore Calogero Gaglio <sup>2</sup>, Carlo Laudanna <sup>1</sup>, Monica Jimenez-Carretero <sup>3</sup>, Concepcion Jimenez-Lopez <sup>3,\*</sup>, Massimiliano Perduca <sup>2,\*,‡</sup> and Stefano Dusi <sup>1,‡</sup>**

<sup>1</sup> Section of General Pathology, Department of Medicine, University of Verona, Strada Le Grazie 8, 37134 Verona, Italy

<sup>2</sup> Department of Biotechnology, University of Verona, Strada Le Grazie 15, 37134 Verona, Italy

<sup>3</sup> Department of Microbiology, Faculty of Sciences, University of Granada, 18071 Granada, Spain

\* Correspondence: [cjl@ugr.es](mailto:cjl@ugr.es) (C.J.-L.); [massimiliano.perduca@univr.it](mailto:massimiliano.perduca@univr.it) (M.P.)

† These authors contributed equally to this work.

‡ These authors equally contributed to conceptualization and supervision.

**Table S1.** Dynamic Light Scattering parameters for MNPs and BMNPs resuspended in PBS or cell culture medium.

| <b>PBS</b>    | <b>Size (nm)</b> | <b>PDI</b>  |
|---------------|------------------|-------------|
| BMNPS         | 88 ± 35          | 0.34 ± 0.11 |
| MNPS          | 60 ± 27          | 0.25 ± 0.15 |
|               |                  |             |
| <b>Medium</b> | <b>Size (nm)</b> | <b>PDI</b>  |
| BMNPS         | 75 ± 30          | 0.26 ± 0.12 |
| MNPS          | 43 ± 21          | 0.44 ± 0.05 |

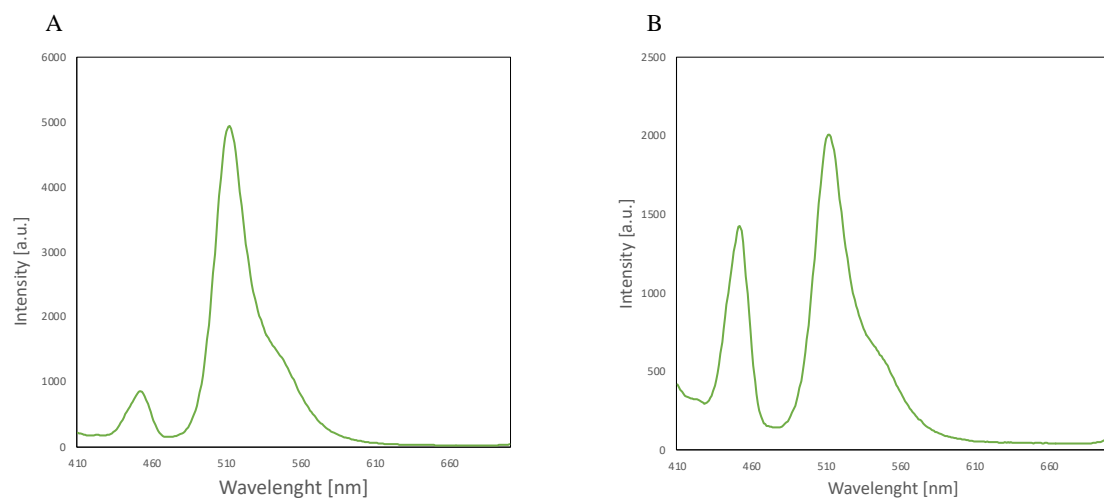

**Figure S1.** Fluorescence spectra for MNPs (A) and BMNPs (B) coupled to GFP. Data were acquired using a Jasco FP-8200 fluorescence spectrometer, exciting the samples at 395nm (excitation bandwidth 5 nm, emission bandwidth 5 nm, response 1 sec, and sensitivity high). The double peak present in both analyzed nanoparticles denotes GFP.

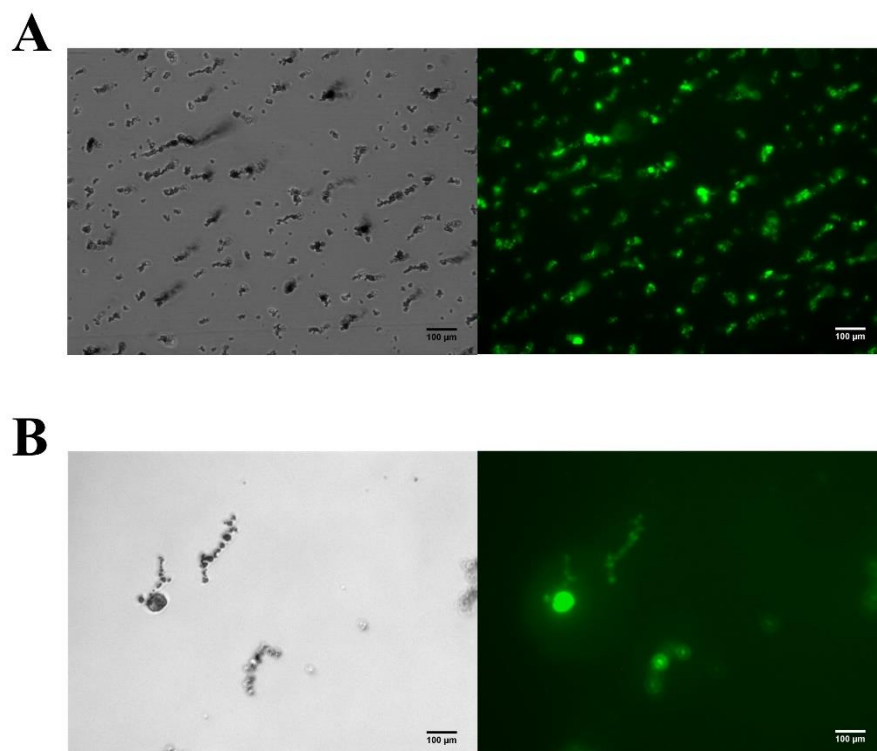

**Figure S2.** Fluorescence microscopy representative images for MNPs (A) and BMNPs (B) coupled to GFP. Images were acquired using an EVOS FLoid imaging System with a 40X magnification and diluting 12 times with PBS the stock samples.

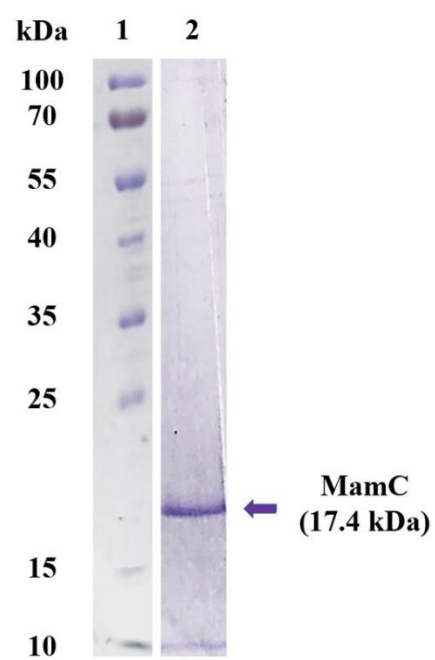

**Figure S3.** Gel electrophoresis of the purified MamC.
